# Supplementary material
Source: Research Square preprint supplement (doi:10.21203/rs.3.rs-8966596/v1)
Supplement: Supplementary file 1 [file bdc5f4724759f9a8cc72f3fe.pdf]

---

# SUPPLEMENTARY INFORMATION FOR: FORVA AND GCM-CLIP: A MILLION-SCALE MULTIMODAL DATASET AND REPRESENTATION LEARNING FRAMEWORK FOR VIRTUAL AUTOPSY

---

**Jikai Mao**  
maojikai@zju.edu.cn

**Nanze Du**  
dunanze@hotmail.com

**Lyu Tu**  
leo\_lyu@yeah.net

**Li Hao**  
lihao@cifs.gov.cn

**Yi Shen**  
sevensevensysy@163.com

**Liang Shen**  
xiaoqiao2006@139.com

**Junjun Guo**  
865408638@qq.com

**Jing Cai\***  
caijing@zjjcxy.cn

## Supplementary Note 1 Prompt Design for Data Annotation and Information Extraction

### Supplementary Note 1.1 Generative Description Prompt

1. Prompts are suitable for providing inputs to generative vision-language large models to enable the accurate and precise description of virtual anatomical images.

## Supplementary Note 2 Prompt Design for Data Annotation and Information Extraction

### Supplementary Note 2.1 Generative Description Prompt

1. Prompts are suitable for providing inputs to generative vision-language large models to enable the accurate and precise description of virtual anatomical images.

"""

You are an expert forensic radiologist. The provided Virtual Autopsy slice shows a post-mortem CT image with a known context of '{cause\_of\_death}' and a specific target symptom.

Your task is to explicitly decouple your radiological report into two hierarchical sections:

(1) 'discovery': Provide a detailed, multi-level semantic description containing exactly TWO sentences. Sentence 1 (Positive): Affirm the presence of the symptom with fine-grained attributes (e.g., 'Contrast-enhanced chest CT scan shows an intimal flap in the aorta, diagnosing an aortic dissection.'). Sentence 2 (Negative): Affirm the healthy, normal state without this symptom (e.g., 'Contrast-enhanced chest CT scan reveals a normal aorta with no signs of intimal flap, dissection, or other pathological lesions.').

- (2) 'impression': This section provides the diagnostic cues and MUST strictly contain the explicit semantic anchors as a nested structure:
- 'location': Identify the main explicit anatomical anchor. Choose from the 8 core regions: [Head, Neck, Chest, Abdomen, Pelvis, Unknown, Upper Leg, Lower Leg].
  - 'disease': Identify the primary forensic pathology or injury typology. You MUST select exactly ONE category from the following 40 predefined options: [Healthy, Laryngeal edema, Putrefactive gas bubbles, Soft tissue hematoma, Fractures, Aortic rupture, Gastric content reflux, Incised wounds, Skin burns, Intimal tear, Blood sedimentation, Airway burns, Hypostatic pulmonary edema, Brain herniation, Visceral autolysis, Airway and digestive tract fluid, Hemopericardium, Internal bleeding, Pulmonary edema, Skull fracture, Internal organ injury, Pericardial effusion, Hemopneumothorax, Ballistic hemorrhage, Hyoid bone fracture, Visceral perforation, High cervical fracture-dislocation, Neck hematoma, Fracture along the wound track, Aortic dissection, Tissue necrosis, Coronary artery calcification, Cerebral edema, Hyperdense lesion in brain parenchyma, Intracranial hemorrhage, Pulmonary embolism, Sinus fluid, Airway foreign body, Periaortic hematoma, Coronary artery occlusion].
  - 'text': Provide concise diagnostic cues summarizing the pathological localization and findings.

Respond ONLY in a valid JSON format with two main keys: "discovery" and "impression".

Example:

```
{
  "discovery": "<value>",
  "impression": {
    "location": "<value>",
    "disease": "<value>",
    "text": "<value>"
  }
}
```

## Supplementary Note 2.2 Information Extraction and Verification Prompt

2. Prompts are used to extract fine-grained injury typologies from generated imaging reports and strictly verify their consistency, acting as a quality assurance gate to eliminate semantic hallucinations or logical contradictions.

"""

You are a professional forensic medical information extraction and verification expert. Your task is to analyze the input virtual autopsy text, extract key pathological information, and strictly VERIFY it against predefined forensic taxonomies. Output in pure JSON format.

Output Requirements

- (1) Output in pure JSON format without any markdown blocks or additional text.
- (2) The JSON structure must reflect the hierarchical nature of the report, containing the following fields:
  - verified\_impression: A nested object containing the explicit semantic anchors:
    - disease: SINGLE most prominent injury/disease type (Must be exactly from the 40 predefined categories).
    - location: SINGLE most prominent anatomical location (Must be exactly from the 8 core regions).
    - concise\_description: Key evidence description.
  - verification\_status: "Pass" or "Fail".
  - error\_reason: Leave empty if "Pass". If "Fail", state the logical contradiction (e.g., "Text says normal aorta, but disease claims Aortic

dissection").

#### Verification & Extraction Principles

##### 1. Disease Category Verification (from Impression):

- Identify the SINGLE most prominent forensic pathology from the text.
- You MUST map it to exactly ONE of the following 40 categories: [Healthy, Laryngeal edema, Putrefactive gas bubbles, Soft tissue hematoma, Fractures, Aortic rupture, Gastric content reflux, Incised wounds, Skin burns, Intimal tear, Blood sedimentation, Airway burns, Hypostatic pulmonary edema, Brain herniation, Visceral autolysis, Airway and digestive tract fluid, Hemopericardium, Internal bleeding, Pulmonary edema, Skull fracture, Internal organ injury, Pericardial effusion, Hemopneumothorax, Ballistic hemorrhage, Hyoid bone fracture, Visceral perforation, High cervical fracture-dislocation, Neck hematoma, Fracture along the wound track, Aortic dissection, Tissue necrosis, Coronary artery calcification, Cerebral edema, Hyperdense lesion in brain parenchyma, Intracranial hemorrhage, Pulmonary embolism, Sinus fluid, Airway foreign body, Periaortic hematoma, Coronary artery occlusion].
- If the text describes a completely normal state, select "Healthy".

##### 2. Anatomical Location Verification (from Impression):

- Map the primary location to exactly ONE of the 8 core regions: [Head, Neck, Chest, Abdomen, Pelvis, Unknown, Upper Leg, Lower Leg].
- If multiple are involved, choose the one with the primary lethal lesion.

##### 3. Key Description Extraction:

- Summarize core forensic/imaging features in 1-2 sentences.
- Retain explicit anchors (e.g., fracture size, fluid density, exact tissue involved).

#### Processing Workflow

1. Locate the forensic findings in the text, specifically identifying the 'impression' cues.
2. Extract the explicit semantic anchors (disease and location) and map them to the strict taxonomies.
3. Consistency Check (Crucial): Verify if the text logically supports the mapped disease. If the text asserts the absence of a lesion but the mapped disease is a positive injury, mark verification\_status as "Fail".
4. Synthesize the concise description.

Now please analyze and verify the following forensic text description:

""

**Supplementary Table S1. Standardized Virtual Autopsy Dataset Acquisition and Reconstruction Protocols.** Detailed scanning parameters (kV, mAs, pitch) and reconstruction window settings (Window Level/Width) applied across core anatomical regions to ensure high-fidelity imaging for the dataset.

| Region                 | Parameter Type                      | Specific Parameters                                                        |
|------------------------|-------------------------------------|----------------------------------------------------------------------------|
| Head and Neck          | Scanning Params                     | 120 kV, 380 mAs, Collimator 64E0.625 mm, Slice 0.625 mm, Pitch 0.4         |
|                        | Reconstruction - Brain Window       | WL: 40, WW: 85                                                             |
|                        | Reconstruction - Bone Window        | WL: 800, WW: 2000                                                          |
|                        | Reconstruction - Soft Tissue Window | WL: 45, WW: 300                                                            |
| Thorax and Abdomen     | Scanning Params                     | 120 kV, 227 mAs (227-400), Collimator 64E0.625 mm, Slice 1.0 mm, Pitch 0.6 |
|                        | Reconstruction - Lung Window        | WL: -600, WW: 1500                                                         |
|                        | Reconstruction - Mediastinum Window | WL: 40, WW: 400                                                            |
|                        | Reconstruction - Bone Window        | WL: 600, WW: 2000                                                          |
| Pelvis and Lower Limbs | Scanning Params                     | 120 kV, 250-400 mAs, Collimator 64E0.625 mm, Slice 1.0 mm, Pitch 0.6       |
|                        | Reconstruction - Bone Window        | WL: 600, WW: 2000                                                          |
|                        | Reconstruction - Soft Tissue Window | WL: 50, WW: 350                                                            |

**Supplementary Table S2. Statistical Composition of the Large-Scale Pre-training Dataset.** The table details the distribution of 1,257,349 image-text pairs across diverse causes of death, serving as the foundational data for GCM-CLIP pre-training.

| Cause of Death               | Number of Text-Image Pairs |
|------------------------------|----------------------------|
| traffic_accident             | 331,595                    |
| high_fall_death              | 216,985                    |
| drowning                     | 200,701                    |
| sudden_death                 | 97,610                     |
| mechanical_asphyxia          | 78,415                     |
| sharp_force_injury_death     | 71,495                     |
| blunt_trauma_death           | 65,536                     |
| coronary_heart_disease_death | 48,810                     |
| natural_death                | 32,114                     |
| mechanical_injury_death      | 25,670                     |
| aortic_rupture_death         | 24,815                     |
| cerebral_hemorrhage_death    | 23,836                     |
| electrocution                | 18,761                     |
| burn                         | 11,190                     |
| aspiration_infarction        | 5,220                      |
| gunshot_wound_death          | 4,596                      |
| <b>Total: 1,257,349</b>      |                            |

**Supplementary Table S3. Statistical Summary of the Fine-Grained Annotated Dataset for Model Fine-Tuning and Evaluation.** This table details the hierarchical distribution of 203,478 image-text pairs across 8 anatomical locations, 40 disease-level classes, and 98 instance-level subtypes, serving as the benchmark for few-shot classification and performance validation.

| Location | Disease-level    | Instance-level (Full Name)                                 | Instance-level (Abbreviation) | Number of Image-Text Pairs |
|----------|------------------|------------------------------------------------------------|-------------------------------|----------------------------|
| Abdomen  | Blood Sed        | Abdominal Mass                                             | Abd Mass                      | 507                        |
| Abdomen  | Gastric Reflux   | Aspiration                                                 | Aspiration                    | 1,521                      |
| Abdomen  | Aortic Rupture   | Contrast Extravasation                                     | Contrast Extrav               | 247                        |
| Abdomen  | Blood Sed        | Complex Cystic and Solid Mass                              | Cx Mass                       | 201                        |
| Abdomen  | Gastric Reflux   | Esophageal Air-Fluid Level                                 | Esoph AFL                     | 442                        |
| Abdomen  | Gastric Reflux   | Esoph Hyperdense                                           | Esoph Hyperdense              | 1,416                      |
| Abdomen  | Gastric Reflux   | Gastroesophageal Reflux                                    | GER                           | 21,488                     |
| Abdomen  | Putrefactive Gas | Gas-containing abscess                                     | Gas Abscess                   | 274                        |
| Abdomen  | Internal Hemo    | Hematoma                                                   | Hematoma                      | 3,565                      |
| Abdomen  | Internal Hemo    | Hemoperitoneum                                             | Hemoperitoneum                | 5,120                      |
| Abdomen  | Blood Sed        | Hyperdense Abdominal Lesion                                | Hyperdense Abd Lesion         | 283                        |
| Abdomen  | Blood Sed        | Hyperdense Abdominal Sedimentation                         | Hyperdense Abd Sed            | 281                        |
| Abdomen  | Blood Sed        | Hyperdense Sedimentation                                   | Hyperdense Sed                | 511                        |
| Abdomen  | Internal Hemo    | Intra-abdominal hemorrhage                                 | IA Hemo                       | 359                        |
| Abdomen  | Putrefactive Gas | Intracranial Gas                                           | IC Gas                        | 2,418                      |
| Abdomen  | Blood Sed        | Intracranial Hemorrhage                                    | ICH                           | 2,305                      |
| Abdomen  | Internal Hemo    | Intraperitoneal hemorrhage                                 | IPHemo                        | 292                        |
| Abdomen  | Organ Inj        | Hepatic hemorrhage                                         | Liver Hemo                    | 359                        |
| Abdomen  | Organ Inj        | Hepatic injury                                             | Liver Inj                     | 2,765                      |
| Abdomen  | Organ Inj        | Hepatic laceration                                         | Liver Lac                     | 2,348                      |
| Abdomen  | Gastric Reflux   | Oropharyngeal foreign material                             | OP FB                         | 218                        |
| Abdomen  | Gastric Reflux   | Oropharyngeal Reflux                                       | OP Reflux                     | 2,811                      |
| Abdomen  | Internal Hemo    | Pelvic Hemorrhage                                          | Pelvic Hemo                   | 2,234                      |
| Abdomen  | Gastric Reflux   | Pharyngeal Gastric Content                                 | Pharyn Gastric Cont           | 258                        |
| Abdomen  | Gastric Reflux   | Pharyngeal Reflux                                          | Pharyn Reflux                 | 1,704                      |
| Abdomen  | Putrefactive Gas | Pneumatosis                                                | Pneumatosis                   | 2,363                      |
| Abdomen  | Putrefactive Gas | Pneumocephalus                                             | Pneumocephalus                | 4,025                      |
| Abdomen  | Putrefactive Gas | Pneumoperitoneum                                           | Pneumoperit                   | 3,060                      |
| Abdomen  | Gastric Reflux   | Posterior Pharyngeal Hyperdensity                          | Post Pharyn Hyperdense        | 1,172                      |
| Abdomen  | Autolysis        | Post-mortem changes                                        | Postmortem                    | 8,416                      |
| Abdomen  | Internal Hemo    | Retroperitoneal hemorrhage                                 | RP Hemo                       | 1,240                      |
| Abdomen  | Blood Sed        | Subarachnoid Hemorrhage                                    | SAH                           | 776                        |
| Abdomen  | Blood Sed        | Subdural Hematoma                                          | SDH                           | 238                        |
| Abdomen  | Blood Sed        | Soft Tissue Calcification                                  | ST Calc                       | 293                        |
| Abdomen  | Putrefactive Gas | Soft Tissue Emphysema                                      | ST Emphysema                  | 15,071                     |
| Abdomen  | Blood Sed        | Soft Tissue Hyperdensity                                   | ST Hyperdense                 | 564                        |
| Abdomen  | Blood Sed        | Soft Tissue Mass                                           | ST Mass                       | 1,067                      |
| Abdomen  | Organ Inj        | Splenic injury                                             | Splenic Inj                   | 4,486                      |
| Abdomen  | Putrefactive Gas | Gas Emphysema                                              | SubQ Emphys                   | 1,820                      |
| Abdomen  | Blood Sed        | Target Lesion                                              | Target Lesion                 | 417                        |
| Chest    | Pulm Edema       | Cardiogenic pulmonary edema                                | Cardio Edema                  | 498                        |
| Chest    | Pericard Eff     | Cardiac silhouette enlargement due to pericardial effusion | Cardiomegaly (PE)             | 204                        |
| Chest    | Hypostatic Edema | Dependent Opacities                                        | Dependent Opac                | 1,108                      |

**Supplementary Table S3.** Continued: Statistical Summary of the Fine-Grained Annotated Dataset

| Location | Disease-level       | Instance-level (Full Name)                                     | Instance-level (Abbreviation) | Number of Image-Text Pairs |
|----------|---------------------|----------------------------------------------------------------|-------------------------------|----------------------------|
| Chest    | Pulm Edema          | Interstitial and Ground-Glass Opacities                        | Interst & GGO                 | 912                        |
| Chest    | Pulm Edema          | Interstitial Edema                                             | Interst Edema                 | 945                        |
| Chest    | Pulm Edema          | Interstitial and Alveolar Edema                                | Interst/Alv Edema             | 1,525                      |
| Chest    | Hypostatic Edema    | Lower lobe predominant pulmonary edema                         | LL Edema                      | 1,096                      |
| Chest    | Hypostatic Edema    | Lower lung zone predominant ground-glass opacities             | LL GGO                        | 486                        |
| Chest    | Hypostatic Edema    | Lower Lung Zone Opacities                                      | LL Opac                       | 1,680                      |
| Chest    | Hemopericard        | Pericardial Effusion                                           | Pericard Eff                  | 1,001                      |
| Chest    | Pericard Eff        | Simple pericardial effusion                                    | Simple Pericard Eff           | 237                        |
| Chest    | Aortic Dissect      | Stanford Type A                                                | Stanford A                    | 2,925                      |
| Chest    | HPTX                | Tension Hemopneumothorax                                       | Tension HPTX                  | 7,221                      |
| Chest    | Pericard Eff        | Normal                                                         | nl                            | 614                        |
| Head     | CE                  | Cerebral edema                                                 | CE                            | 818                        |
| Head     | CE                  | Cytotoxic Edema                                                | Cyto Edema                    | 844                        |
| Head     | CE                  | Diffuse Cerebral Edema                                         | DCE                           | 851                        |
| Head     | Ballistic Hemo      | Intraparenchymal Hemorrhage                                    | IPH                           | 309                        |
| Head     | ICH                 | Intraparenchymal Hemorrhage                                    | IPH                           | 15,244                     |
| Head     | ICH                 | Intraparenchymal hemorrhage with mass effect                   | IPH-ME                        | 10,049                     |
| Head     | ICH                 | Intraparenchymal hemorrhage with mass effect and midline shift | IPH-ME/MS                     | 3,023                      |
| Head     | Skull Fx            | Linear Skull Fracture                                          | Linear Skull Fx               | 3,088                      |
| Head     | Sinus Fluid         | Maxillary Sinus Opacification                                  | Max Sinus Opac                | 2,251                      |
| Head     | Sinus Fluid         | Maxillary sinusitis                                            | Max Sinusitis                 | 2,291                      |
| Head     | Incised Wnd         | Soft Tissue Injury                                             | ST Injury                     | 677                        |
| Head     | Sinus Fluid         | Sinus fluid                                                    | Sinus Fluid                   | 4,859                      |
| Head     | Sinus Fluid         | Paranasal Sinus Opacification                                  | Sinus Opac                    | 8,710                      |
| Head     | ICH                 | Sphenoid wing hemorrhage                                       | Sphenoid Hemo                 | 1,394                      |
| Head     | Brain Hern          | Subfalcine Herniation                                          | Subfalcine Hern               | 2,322                      |
| Head     | Incised Wnd         | Normal                                                         | nl                            | 614                        |
| Head     | Burns               | Normal Head CT                                                 | nl Head CT                    | 781                        |
| Neck     | High C-spine Fx/Lux | Atlanto-occipital dislocation                                  | AOD                           | 460                        |
| Neck     | Airway/Digest Fluid | Fluid in the airway and digestive tract                        | Airway/Digest Fluid           | 301                        |
| Neck     | Neck Hema           | Anterior Neck Hematoma                                         | Ant Neck Hematoma             | 1,882                      |
| Neck     | Airway/Digest Fluid | Bowel Obstruction                                              | Bowel Obstr                   | 297                        |
| Neck     | Airway/Digest Fluid | Cervical Fluid Accumulation                                    | C-spine Fluid                 | 218                        |
| Neck     | Intimal Tear        | Carotid artery intimal tear                                    | Carotid Tear                  | 202                        |
| Neck     | ST Hematoma         | Heterogeneous soft tissue density with irregular margins       | Hetero ST Density             | 247                        |
| Neck     | Hyoid Fx            | Hyoid Bone Cortical Disruption                                 | Hyoid Fx-Disrupt              | 678                        |
| Neck     | Hyoid Fx            | Hyoid bone fracture with discontinuity and irregularity        | Hyoid Fx-Irreg                | 484                        |

**Supplementary Table S3.** Continued: Statistical Summary of the Fine-Grained Annotated Dataset

| Location | Disease-level       | Instance-level (Full Name)                              | Instance-level (Abbreviation) | Number of Image-Text Pairs |
|----------|---------------------|---------------------------------------------------------|-------------------------------|----------------------------|
| Neck     | Hyoid Fx            | Hyoid Bone Fracture with Discontinuity and Misalignment | Hyoid Fx-Mal                  | 216                        |
| Neck     | ST Hematoma         | Hyperdense Soft Tissue Collection                       | Hyperdense ST Coll            | 732                        |
| Neck     | ST Hematoma         | Hyperdense Soft Tissue Hematoma                         | Hyperdense ST Hema            | 675                        |
| Neck     | ST Hematoma         | Hyperdense Soft Tissue Lesion                           | Hyperdense ST Lesion          | 897                        |
| Neck     | ST Hematoma         | Intramuscular Hematoma                                  | IM Hematoma                   | 543                        |
| Neck     | Larynx Edema        | Laryngeal Soft Tissue Edema                             | Larynx Edema                  | 229                        |
| Neck     | Airway/Digest Fluid | Retropharyngeal Fluid Collection                        | Retropharynx Fluid Coll       | 227                        |
| Neck     | Neck Hema           | Soft Tissue Hematoma                                    | ST Hematoma                   | 3,888                      |
| Pelvis   | Fx                  | Bilateral iliac wing fractures                          | Bilat Iliac Fx                | 816                        |
| Pelvis   | Fx                  | Cervical Spine Fracture                                 | C-spine Fx                    | 670                        |
| Pelvis   | Fx                  | Comminuted Fracture                                     | Comminuted Fx                 | 3,422                      |
| Pelvis   | Fx                  | Iliac Wing Fractures                                    | Iliac Fx                      | 246                        |
| Pelvis   | Fx                  | Left iliac wing fracture                                | L Iliac Fx                    | 331                        |
| Pelvis   | Fx                  | Pelvic Ring Fracture                                    | Pelvic Ring Fx                | 6,082                      |
| Pelvis   | Fx                  | Rib fractures                                           | Rib Fx                        | 353                        |
| Pelvis   | Fx                  | Skull Fracture                                          | Skull Fx                      | 836                        |
| Pelvis   | Fx                  | Transverse Fracture                                     | Trans Fx                      | 480                        |
| Pelvis   | Fx                  | Transverse Tibial Fracture                              | Trans Tib Fx                  | 554                        |
|          |                     |                                                         | <b>Total</b>                  | <b>203,478</b>             |

**Supplementary Table S4. Distribution of the ForVA Test Set.** This table details the composition of 4,096 image-text pairs from our self-constructed forensic dataset. To optimize space, the categories are split into two columns.

| <b>Disease-level</b>                 | <b>Pairs</b> | <b>Disease-level</b>                  | <b>Pairs</b> |
|--------------------------------------|--------------|---------------------------------------|--------------|
| Healthy                              | 124          | Laryngeal edema                       | 104          |
| Putrefactive gas bubbles             | 111          | Soft tissue hematoma                  | 104          |
| Fractures                            | 110          | Aortic rupture                        | 104          |
| Gastric content reflux               | 109          | Incised wounds                        | 104          |
| Skin burns                           | 108          | Intimal tear                          | 103          |
| Blood sedimentation                  | 107          | Airway burns                          | 103          |
| Hypostatic pulmonary edema           | 107          | Brain herniation                      | 103          |
| Visceral autolysis                   | 107          | Airway and digestive tract fluid      | 103          |
| Hemopericardium                      | 106          | Internal bleeding                     | 103          |
| Pulmonary edema                      | 106          | Skull fracture                        | 103          |
| Internal organ injury                | 106          | Pericardial effusion                  | 103          |
| Hemopneumothorax                     | 106          | Ballistic hemorrhage                  | 102          |
| Hyoid bone fracture                  | 106          | Visceral perforation                  | 102          |
| High cervical fracture-dislocation   | 106          | Neck hematoma                         | 102          |
| Fracture along the wound track       | 106          | Aortic dissection                     | 102          |
| Tissue necrosis                      | 105          | Coronary artery calcification         | 102          |
| Cerebral edema                       | 105          | Hyperdense lesion in brain parenchyma | 86           |
| Intracranial hemorrhage              | 105          | Pulmonary embolism                    | 80           |
| Sinus fluid                          | 105          | Airway foreign body                   | 72           |
| Periaortic hematoma                  | 104          | Coronary artery occlusion             | 62           |
| <b>Total Image-Text Pairs: 4,096</b> |              |                                       |              |

**Supplementary Table S5. Composition of the External Zero-Shot Test Set: MIMIC-CXR.** A subset of 1,024 chest CT image-text pairs strictly filtered from the MIMIC-CXR dataset using "CT" keywords. This set evaluates the model's capability to transfer forensic knowledge to routine clinical chest imaging without fine-tuning.

| <b>Disease-level</b>                                 | <b>Number of Image-Text Pairs</b> |
|------------------------------------------------------|-----------------------------------|
| Pleural effusion and pleural lesions                 | 65                                |
| Unknown cause and unclassified lesions               | 64                                |
| Cardiovascular system lesions                        | 58                                |
| Atelectasis and reduction of lung volume             | 57                                |
| Pulmonary tumor lesions                              | 55                                |
| Pulmonary infectious lesions                         | 54                                |
| Benign nodules and cysts in the lungs                | 53                                |
| Emphysema and COPD                                   | 53                                |
| Chest wall and bone lesions                          | 52                                |
| Interstitial lung disease                            | 52                                |
| Mediastinal lesions                                  | 51                                |
| Normal and other rare lesions                        | 51                                |
| Postoperative/radiation therapy changes              | 51                                |
| Diaphragmatic abnormalities and diaphragmatic hernia | 51                                |
| Bronchopathy                                         | 51                                |
| Calcifying lesions in the lungs                      | 51                                |
| Abdominal related chest involvement lesions          | 50                                |
| Thyroid lesions                                      | 41                                |
| Pulmonary hemorrhage and contusion                   | 40                                |
| Pulmonary embolism and pulmonary vascular disease    | 24                                |
| <b>Total: 1,024</b>                                  |                                   |

**Supplementary Table S6. Composition of the External Zero-Shot Test Set: PMC-OA.** A curated subset of 4,096 image-text pairs derived from biomedical literature in the PMC-OA dataset. Screened for chest CT modalities, this set assesses the model’s generalization across diverse, literature-sourced medical imagery.

| Disease Level                      | Near-Equal Number |
|------------------------------------|-------------------|
| Other/Complex and Rare Diseases    | 205               |
| Nodule and Mass                    | 205               |
| Vascular Abnormalities             | 205               |
| Ground-Glass Opacity/Consolidation | 205               |
| Trauma/Fracture                    | 205               |
| Cyst                               | 205               |
| Lymphadenectasis                   | 205               |
| Diffuse Bone Destruction           | 205               |
| Obstruction/Dilatation             | 205               |
| Hemorrhage/Hematoma                | 205               |
| Infarction/Ischemia                | 205               |
| Calcification                      | 204               |
| Pneumoperitoneum/Free Gas          | 204               |
| Effusion                           | 204               |
| Necrosis/Liquefaction              | 204               |
| Fibrosis/Scar                      | 205               |
| Osteoproliferation/Sclerosis       | 205               |
| Fat Density                        | 205               |
| Edema/Exudation                    | 205               |
| Cavity                             | 205               |
| <b>Total:4,096</b>                 |                   |

**Supplementary Table S7. Composition of the External Zero-Shot Test Set: ROCov2.** A selection of 4,096 multimodal radiology images and captions from the ROCov2 dataset. This subset challenges the model with varied biomedical imaging contexts to rigorously test its zero-shot cross-domain adaptability.

| Disease Level                    | Number of Image-Text Pairs |
|----------------------------------|----------------------------|
| Nodule_Mass                      | 205                        |
| Necrosis_Liquefaction            | 205                        |
| Trauma_Fracture                  | 205                        |
| OtherCategories                  | 205                        |
| Obstruction_Dilatation           | 205                        |
| Cyst                             | 205                        |
| Hemorrhage_Hematoma              | 205                        |
| GroundGlassOpacity_Consolidation | 205                        |
| Effusion                         | 205                        |
| Pneumoperitoneum_FreeGas         | 205                        |
| Edema_Exudation                  | 205                        |
| VascularAbnormalities            | 205                        |
| Calcification                    | 204                        |
| Cavity_Sinus                     | 205                        |
| Infarction_Ischemia              | 205                        |
| DiffuseBoneDestruction           | 205                        |
| Fibrosis_Scar                    | 205                        |
| FatDensity                       | 204                        |
| BoneHyperplasia_Sclerosis        | 204                        |
| Lymphadenopathy                  | 204                        |
| <b>Total:4,096</b>               |                            |

**Supplementary Table S8. Statistical Distribution of the Dedicated Object Detection Dataset.** This table details the sample composition for the six key forensic lesion categories (e.g., Pulmonary Edema, Hyoid Fracture) used in the downstream object detection task. These expert-annotated samples serve as a fine-grained benchmark for evaluating the model’s localization generalization.

| <b>Lesion Category</b> | <b>Number of Samples</b> |
|------------------------|--------------------------|
| Sinus Fluid            | 379                      |
| Pulm Edema             | 4,190                    |
| HPTX                   | 291                      |
| Gastric Reflux         | 1,572                    |
| Hyoid FX               | 20                       |
| Airway/Digest Fluid    | 2,778                    |
|                        | <b>Total: 9,230</b>      |

**Supplementary Table S9. Comparative Evaluation of Zero-Shot Classification Performance on the ForVA Benchmark.** This table presents a quantitative comparison of GCM-CLIP against state-of-the-art baseline models across three hierarchical tasks: anatomical localization (Loc), disease identification (Dis), and joint fine-grained classification (Dis\_Loc). The substantial performance gains (e.g., +0.099 in Loc@1 and +0.051 in Dis@1 vs. BiomedCLIP) validate the efficacy of the *Explicit-Implicit Multi-task Supervision* in overcoming forensic image noise and establishing robust cross-modal semantic mappings.

| Model      | Dis_Loc@1     | Dis_Loc@5     | Dis@1         | Dis@5         | Loc@1         | Loc@5         |
|------------|---------------|---------------|---------------|---------------|---------------|---------------|
| PubMedCLIP | 0.0175        | 0.1552        | 0.0856        | 0.2421        | 0.2614        | 0.4960        |
| BiomedCLIP | 0.0993        | 0.2519        | 0.2028        | 0.3981        | 0.5546        | 0.9187        |
| GLoRIA     | 0.0769        | 0.2356        | 0.1530        | 0.2844        | 0.4328        | 0.5827        |
| MGCA       | 0.0759        | 0.2788        | 0.1530        | 0.3505        | 0.3413        | 0.5507        |
| medsiglip  | 0.0478        | 0.2458        | 0.1696        | 0.3442        | 0.2417        | 0.4006        |
| GCM-CLIP   | <b>0.1220</b> | <b>0.2858</b> | <b>0.2536</b> | <b>0.4169</b> | <b>0.6530</b> | <b>0.9502</b> |

**Supplementary Table S10. Quantitative Assessment of Cross-Modal Semantic Alignment via Retrieval Tasks.** This table reports the Recall@K metrics (R@1, R@5, R@10) for bidirectional retrieval tasks. GCM-CLIP consistently outperforms state-of-the-art baselines across all metrics, achieving substantial gains (e.g.,  $\sim 0.08$ – $0.10$  improvement in Image-to-Text accuracy over BiomedCLIP). These results validate the effectiveness of the *Generalized Category Mining (GCM)* mechanism in disentangling complex forensic semantics and enhancing feature discrimination through explicit-implicit supervision.

| Model      | image_to<br>text_R@1 | image_to<br>text_R@5 | image_to<br>text_R@10 | text_to<br>image_R@1 | text_to<br>image_R@5 | text_to<br>image_R@10 |
|------------|----------------------|----------------------|-----------------------|----------------------|----------------------|-----------------------|
| PubMedCLIP | 0.0752               | 0.2763               | 0.4345                | 0.0905               | 0.2995               | 0.4440                |
| BiomedCLIP | 0.2431               | 0.5459               | 0.6823                | 0.2500               | 0.5407               | 0.6796                |
| GLoRIA     | 0.1728               | 0.4870               | 0.6591                | 0.1679               | 0.4960               | 0.6630                |
| MGCA       | 0.2294               | 0.5761               | 0.7089                | 0.2448               | 0.5722               | 0.7177                |
| medsiglip  | 0.2731               | 0.5937               | 0.7487                | 0.2675               | 0.6032               | 0.7448                |
| GCM-CLIP   | <b>0.3230</b>        | <b>0.6425</b>        | <b>0.7675</b>         | <b>0.3134</b>        | <b>0.6413</b>        | <b>0.7702</b>         |

**Supplementary Table S11. Assessment of Data Efficiency and Generalization Capabilities for Unseen Diseases.** This table compares model performance across varying training data fractions. GCM-CLIP demonstrates a breakthrough in data efficiency, addressing the scarcity of labeled samples for rare forensic pathologies. Notably, in the extreme scenario using only 1% of labeled data, GCM-CLIP achieves an accuracy of 0.5429 on the Instance-level (Unseen Disease) task, significantly outperforming the baseline BiomedCLIP trained with 100% full annotations (0.4860).

| Model      | Location      |               |               | Disease-level |               |               | Instance-level (Unseen Disease) |               |               |
|------------|---------------|---------------|---------------|---------------|---------------|---------------|---------------------------------|---------------|---------------|
|            | 1%            | 10%           | 100%          | 1%            | 10%           | 100%          | 1%                              | 10%           | 100%          |
| PubMedCLIP | 0.4240        | 0.4223        | 0.4035        | 0.0512        | 0.0324        | 0.0324        | 0.5716                          | 0.5826        | 0.5875        |
| BiomedCLIP | 0.6149        | 0.6928        | 0.7627        | 0.3584        | 0.6167        | 0.6564        | 0.4528                          | 0.4770        | 0.4860        |
| GLoRIA     | 0.6169        | 0.6237        | 0.6171        | 0.1084        | 0.1103        | 0.0949        | 0.5071                          | 0.5394        | 0.5421        |
| MGCA       | 0.7470        | 0.7487        | 0.7460        | 0.4519        | 0.5173        | 0.5466        | 0.5281                          | 0.5575        | 0.6027        |
| medsiglip  | 0.6264        | 0.6037        | 0.6076        | 0.5141        | 0.6420        | 0.6743        | 0.5271                          | <b>0.5971</b> | 0.5980        |
| GCM-CLIP   | <b>0.7580</b> | <b>0.7688</b> | <b>0.7793</b> | <b>0.5976</b> | <b>0.7155</b> | <b>0.7238</b> | <b>0.5429</b>                   | 0.5849        | <b>0.6215</b> |

**Supplementary Table S12. Quantitative evaluation of multi-granularity semantic disentanglement.** The Normalized Mutual Information (NMI) scores measure the correlation between the mined implicit clusters and explicit forensic labels. Note the significant increase in pathological alignment from Set A to Set B, while anatomical correlation remains consistently low.

| Cluster Set | Semantic Granularity | Semantic Correlation (NMI) |          | $\Delta$ Gap |
|-------------|----------------------|----------------------------|----------|--------------|
|             |                      | Disease                    | Location |              |
| Set A       | Coarse-grained       | 0.6730                     | 0.3152   | 0.3578       |
| Set B       | Fine-grained         | 0.8298                     | 0.3774   | 0.4524       |

**Supplementary Table S13. Ablation Study Quantifying the Contribution of Core GCM Components.** This table presents a systematic evaluation of model performance under different configurations of Explicit Supervision (Exp. Sup.), Implicit Supervision (Imp. Sup.), and the GOS module. The results demonstrate that while Explicit Supervision establishes foundational alignment, its combination with Implicit Supervision creates a powerful synergistic effect, driving a substantial performance leap on the domain-specific ForVA dataset (Loc@1 increases to 0.6530). The final inclusion of GOS further enhances generalization, achieving peak accuracy across all four testing benchmarks.

| Exp. Sup. | Imp. Sup. | GOS | roco          |               | mimic-cxr     |               | pmc-oa        |               | ForVA         |               |
|-----------|-----------|-----|---------------|---------------|---------------|---------------|---------------|---------------|---------------|---------------|
|           |           |     | Loc@1         | Cat@1         | Loc@1         | Cat@1         | Loc@1         | Cat@1         | Loc@1         | Cat@1         |
|           |           |     | 0.3452        | 0.1306        | 0.1333        | 0.1499        | 0.3491        | 0.1042        | 0.5544        | 0.2026        |
| ✓         |           |     | 0.4223        | 0.1440        | 0.3828        | 0.1508        | 0.4008        | 0.1093        | 0.5897        | 0.2290        |
|           | ✓         |     | 0.3264        | 0.1396        | 0.0976        | 0.1440        | 0.3750        | 0.0991        | 0.3960        | 0.1291        |
| ✓         | ✓         |     | 0.5854        | 0.1702        | 0.5642        | 0.1528        | 0.4194        | 0.1179        | 0.6227        | 0.2368        |
| ✓         | ✓         | ✓   | <b>0.6073</b> | <b>0.1707</b> | <b>0.5790</b> | <b>0.1632</b> | <b>0.5086</b> | <b>0.2157</b> | <b>0.6530</b> | <b>0.2536</b> |

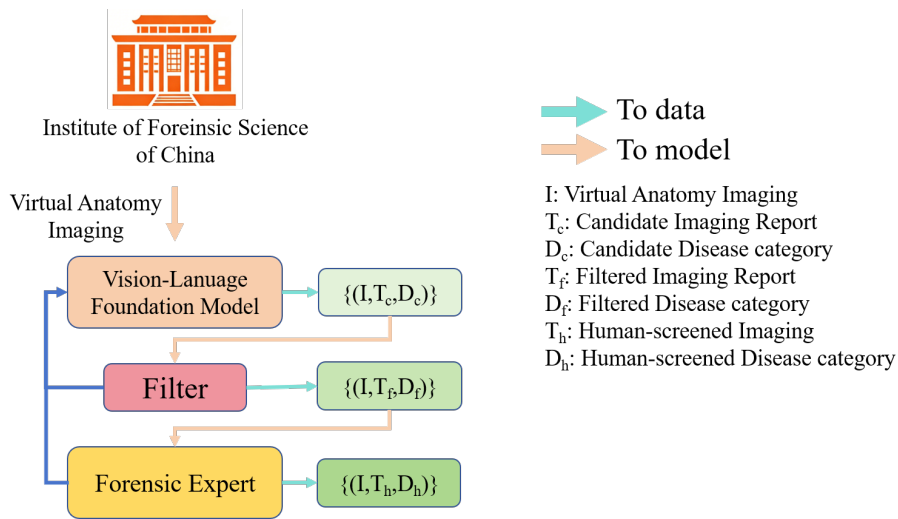

**Supplementary Figure S1.** Iterative data curation pipeline for forensic virtual anatomy. Raw virtual anatomy imaging ( $I$ ) sourced from the Institute of Forensic Science of China undergoes a coarse-to-fine annotation process. Initially, a Vision-Language Foundation Model generates candidate imaging reports ( $T_c$ ) and disease categories ( $D_c$ ). To ensure evidentiary reliability, these outputs are processed by an automated Filter to produce a refined subset ( $T_f, D_f$ ), followed by rigorous screening by Forensic Experts to establish the final human-validated ground truth ( $T_h, D_h$ ). Crucially, a feedback mechanism (blue arrows) leverages verification outcomes from both the filtering and expert screening stages to iteratively refine the foundation model. Teal arrows denote the generation of data outputs, while peach arrows indicate the sequential processing flow.

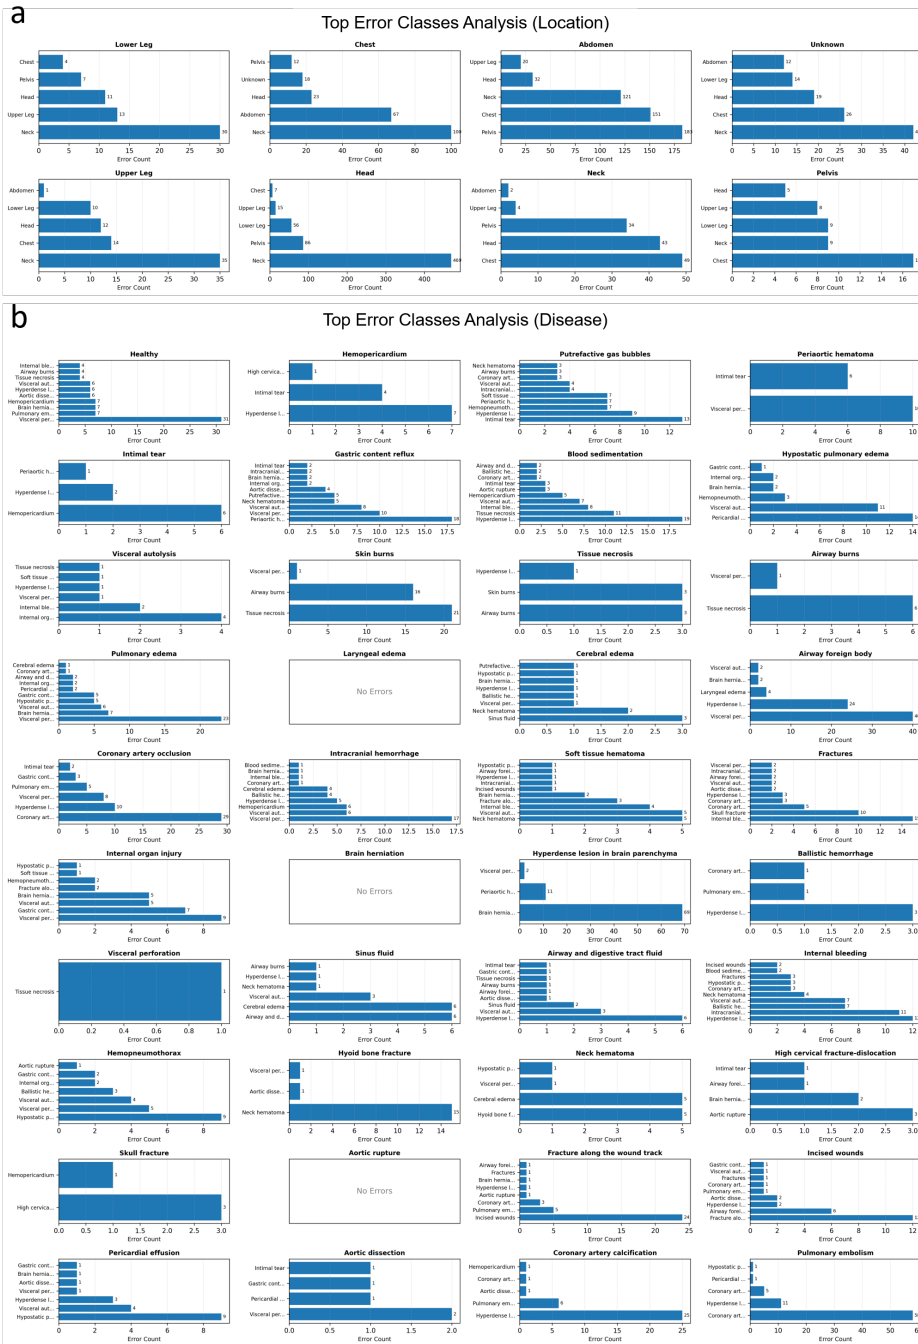

**Supplementary Figure S2.** Error Class Distribution of GCM-CLIP. (a) Bar charts showing the frequency of mispredicted anatomical locations when the model fails to identify the true site. (b) Bar charts showing the distribution of mispredicted injury categories, with “No Errors” denoting categories without misclassifications. Our analysis reveals that the model’s error distribution adheres to the forensic “injury complex” principle: misclassifications tend to involve pathologically related adjacent categories rather than random noise. For instance, Intracranial hemorrhage is often misclassified as Cerebral edema or Skull fracture, reflecting the pathological cascade of skull fracture causing traumatic hemorrhage, which in turn induces secondary edema. Similarly, Intimal tear is frequently misclassified as Hemopericardium, aligning with the clinical pathology that aortic intimal tears often precede rupture into the pericardial cavity. These findings demonstrate that GCM-CLIP implicitly learns the pathological associations between injuries.

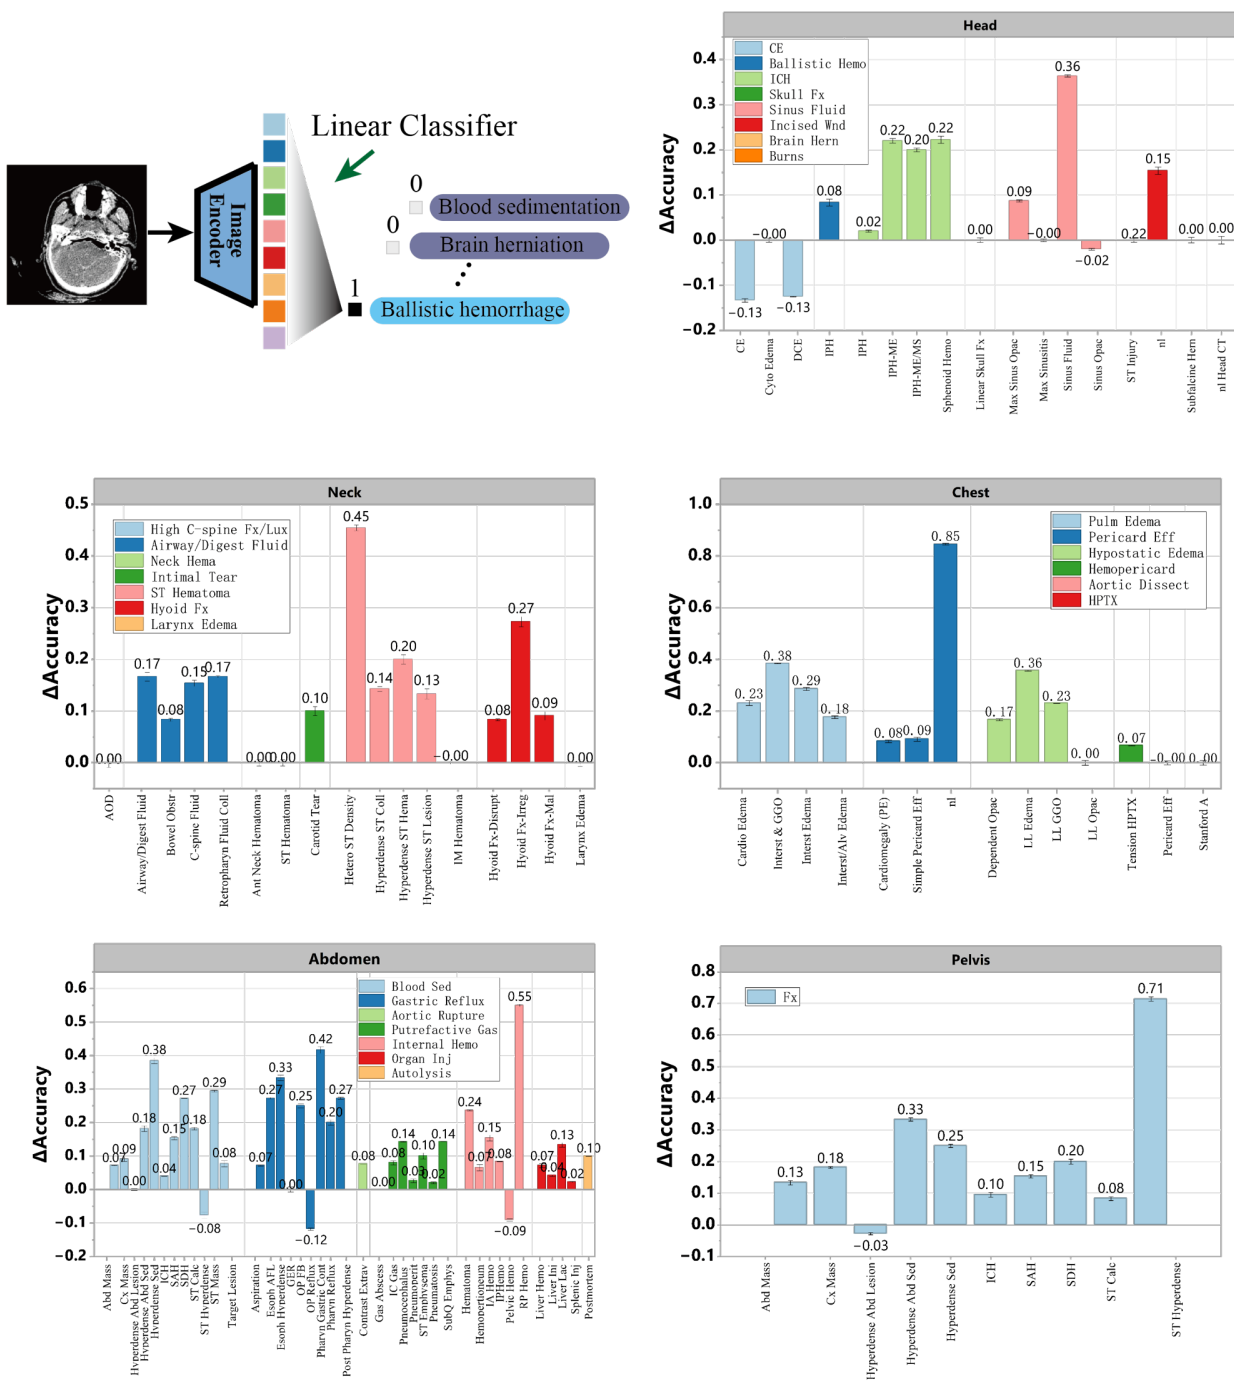

**Supplementary Figure S3.** Evaluation of Fine-Grained Representation Capabilities via Linear Probing. The schematic (top left) illustrates the linear probing protocol used to assess the discriminative quality of frozen image features. The bar charts present the differential accuracy ( $\Delta$ Accuracy), calculated as the performance of GCM-CLIP minus the baseline BiomedCLIP, across five core anatomical regions (Head, Neck, Chest, Abdomen, and Pelvis). Positive values indicate superior performance of GCM-CLIP. The results demonstrate significant gains in identifying subtle and abstract forensic pathological subtypes. Notably, in the **Head** region, GCM-CLIP achieves a performance boost of 0.22 for Intracerebral hemorrhage with Mass Effect (IPH-ME) and 0.22 for Sphenoid Sinus Hemorrhage (Sphenoid Hemo)—a critical indicator for skull base fractures. In the **Abdomen** region, the model exhibits a substantial gain of 0.55 for Retroperitoneal Hematoma (RP Hemo), validating its robustness in detecting deep-seated traumatic features and complex injuries often compromised by post-mortem artifacts.

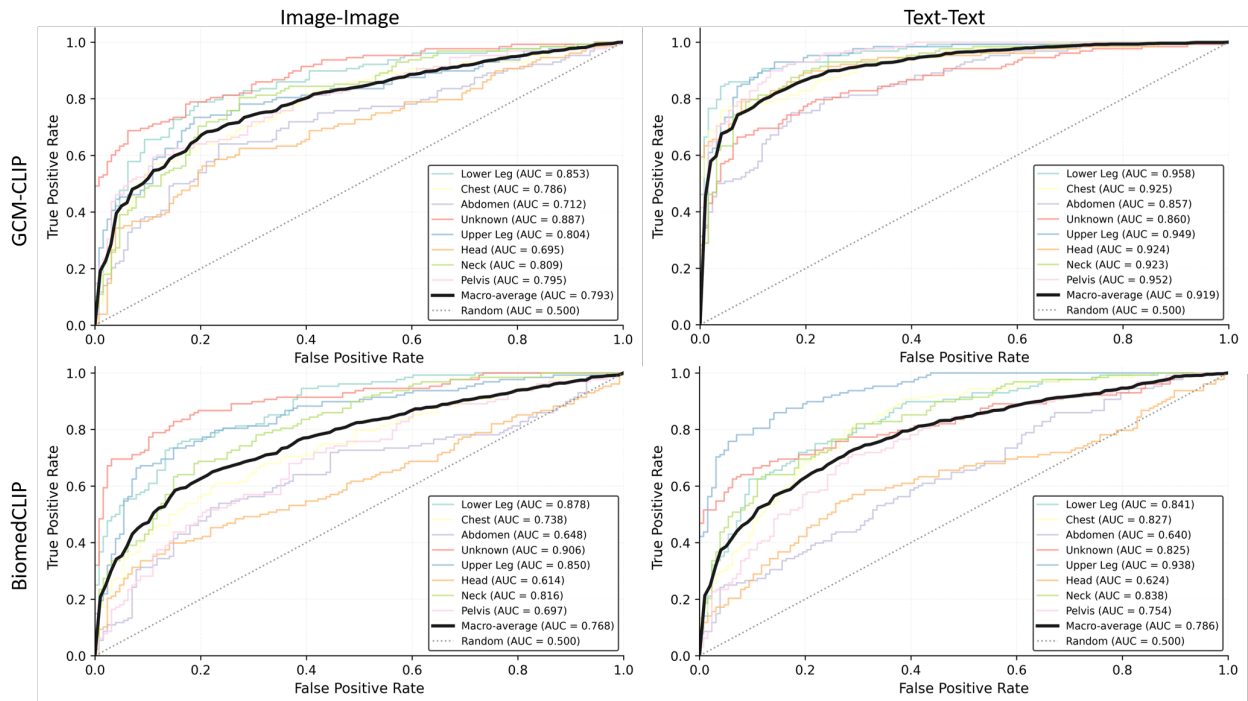

**Supplementary Figure S4. Qualitative Visualization of Coarse-Grained Semantic Disentanglement via Sankey Diagrams.** This diagram illustrates the mapping dynamics between the macroscopic coarse clusters generated by the GCM mechanism and explicit forensic labels (anatomical locations and lesion categories). The non-bijective flows reveal that these coarse clusters broadly group macroscopic lesion mechanisms and "pathological families" rather than merely memorizing static explicit anchors. This visualization qualitatively confirms the GCM mechanism's effectiveness in isolating ontological pathological features from redundant anatomical background noise at a macroscopic level.



**Supplementary Figure S5. ROC Curve Analysis for Anatomical Region Identification.** This figure illustrates the Receiver Operating Characteristic (ROC) curves evaluating the model’s performance in discriminating across eight core anatomical regions (e.g., Head, Neck, Chest, Abdomen, and Pelvis). The tight clustering of curves in the upper-left quadrant demonstrates GCM-CLIP’s exceptional robustness in capturing macroscopic anatomical features. This high discriminative power confirms that the GCM mechanism effectively filters out post-mortem artifacts and background noise, ensuring stable and precise anatomical localization as a prerequisite for downstream pathological diagnostic tasks.
